# Supplementary material for: Exploring the structural diversities and magnetic properties of copper(ii) and manganese(ii) complexes based on 5-methoxyisophthalate and flexible bis(imidazole) ligands
Source: Royal Society of Chemistry journal article supplement (doi:10.1039/c3ce41641k), 2013-10-31
Supplement: c3ce41641k.pdf [file c3ce41641k.pdf]

**Electronic Supplementary Information (ESI) for**

**Exploring the Structural Diversities and Magnetic Properties of  
Copper(II) and Manganese(II) Complexes Based on  
5-Methoxyisophthalate and Flexible Bis(Imidazole) Ligands**

Xin-Hong Chang,<sup>†</sup> Jian-Hua Qin,<sup>†</sup> Min-Le Han,<sup>†</sup> Lu-Fang Ma,<sup>\*,†</sup> and Li-Ya Wang<sup>\*,†,‡</sup>

<sup>†</sup>*College of Chemistry and Chemical Engineering, Luoyang Normal University, Luoyang 471022, P. R. China.*

<sup>‡</sup>*College of Chemistry and Pharmaceutical Engineering, Nanyang Normal University, Nanyang 473061, P. R.*

*China*

**Table S1 Selected bond lengths (Å) and angles (°) for 1**

|                     |             |                     |             |
|---------------------|-------------|---------------------|-------------|
| Cu(1)-O(6)          | 1.9208(18)□ | Cu(1)-O(6)#1        | 1.9288(17)□ |
| Cu(1)-O(2)          | 1.9653(17)□ | Cu(1)-N(1)          | 1.987(2)□   |
| Cu(2)-O(4)#2        | 1.9537(17)□ | Cu(2)-O(4)#3        | 1.9537(17)□ |
| Cu(2)-O(1)          | 2.0105(17)  | Cu(2)-O(1)#4        | 2.0105(17)□ |
| O(6)-Cu(1)-O(6)#1   | 80.15(8)□   | O(6)-Cu(1)-O(2)     | 94.47(7)□   |
| O(6)#1-Cu(1)-O(2)   | 161.74(8)□  | O(6)-Cu(1)-N(1)     | 170.43(9)□  |
| O(6)#1-Cu(1)-N(1)   | 100.37(8)□  | O(2)-Cu(1)-N(1)     | 87.84(8)□   |
| O(4)#2-Cu(2)-O(4)#3 | 92.76(11)□  | O(4)#2-Cu(2)-O(1)#4 | 173.99(7)□  |
| O(4)#3-Cu(2)-O(1)#4 | 87.67(8)□   | O(4)#2-Cu(2)-O(1)   | 87.67(8)□   |
| O(4)#3-Cu(2)-O(1)   | 173.99(7)□  | O(1)#4-Cu(2)-O(1)   | 92.54(11)   |

Symmetry transformations used to generate equivalent atoms: #1  $-x + 1, -y, -z + 1$ ; #2  $-x + 1/2, y - 1/2, z$ ; #3  $x + 1/2, y - 1/2, -z + 1/2$ ; #4  $-x + 1, y, -z + 1/2$ .

**Table S2 Selected bond lengths (Å) and angles (°) for 2**

|                     |             |                     |            |
|---------------------|-------------|---------------------|------------|
| Cu(1)-N(4)#1        | 1.979(2)□   | Cu(1)-N(1)          | 1.986(3)□  |
| Cu(1)-O(4)#2        | 2.004(2)□   | Cu(1)-O(1)          | 2.048(2)□  |
| Cu(1)-O(3)#3        | 2.273(2)    |                     |            |
| N(4)#1-Cu(1)-N(1)   | 175.10(10)□ | N(4)#1-Cu(1)-O(4)#2 | 95.97(10)□ |
| N(1)-Cu(1)-O(4)#2   | 87.00(9)□   | N(4)#1-Cu(1)-O(1)   | 89.17(10)□ |
| N(1)-Cu(1)-O(1)     | 90.15(9)□   | O(4)#2-Cu(1)-O(1)   | 150.44(9)□ |
| N(4)#1-Cu(1)-O(3)#3 | 90.48(10)□  | N(1)-Cu(1)-O(3)#3   | 84.81(10)□ |
| O(4)#2-Cu(1)-O(3)#3 | 110.63(8)□  | O(1)-Cu(1)-O(3)#3   | 98.38(9)   |

Symmetry transformations used to generate equivalent atoms: #1  $x + 1, y, z - 1$ ; #2  $x - 1, y + 1, z$ ; #3  $-x + 2, -y + 1, -z + 1$ .

**Table S3 Selected bond lengths (Å) and angles (°) for 3**

|                     |             |                   |             |
|---------------------|-------------|-------------------|-------------|
| Cu(1)-O(1)          | 1.925(3)□   | Cu(1)-O(3)#1      | 1.933(3)□   |
| Cu(1)-N(4)#2        | 1.985(4)□   | Cu(1)-N(1)        | 1.994(4)□   |
| Cu(1)-O(6)          | 2.596(4)    |                   |             |
| O(1)-Cu(1)-O(3)#1   | 148.57(13)□ | O(1)-Cu(1)-N(4)#2 | 93.48(13)□  |
| O(3)#1-Cu(1)-N(4)#2 | 91.10(13)□  | O(1)-Cu(1)-N(1)   | 92.28(14)□  |
| O(3)#1-Cu(1)-N(1)   | 88.57(13)□  | N(4)#2-Cu(1)-N(1) | 169.45(14)□ |
| O(1)-Cu(1)-O(6)     | 111.57(13)□ | O(3)#1-Cu(1)-O(6) | 99.85(13)□  |
| N(4)#2-Cu(1)-O(6)   | 81.25(14)□  | N(1)-Cu(1)-O(6)   | 88.42(14)   |

Symmetry transformations used to generate equivalent atoms: #1  $x + 1, y, z$ ; #2  $-x + 1, -y + 1, -z + 2$ .

**Table S4 Selected bond lengths (Å) and angles (°) for 4**

|                     |             |                     |             |
|---------------------|-------------|---------------------|-------------|
| Mn(1)-O(6)          | 2.107(3)□   | Mn(1)-O(6)#1        | 2.107(3)□   |
| Mn(1)-O(4)#2        | 2.213(3)□   | Mn(1)-O(4)#3        | 2.213(3)□   |
| Mn(1)-O(1)#1        | 2.217(3)□   | Mn(1)-O(1)          | 2.217(3)□   |
| Mn(2)-O(13)         | 2.108(3)□   | Mn(2)-O(7)          | 2.128(3)□   |
| Mn(2)-O(25)         | 2.226(3)□   | Mn(2)-O(4)#2        | 2.315(3)□   |
| Mn(2)-O(2)          | 2.342(3)□   | Mn(2)-O(1)          | 2.416(3)□   |
| Mn(2)-O(3)#2        | 2.422(3)□   | Mn(3)-O(11)         | 2.121(3)□   |
| Mn(3)-O(8)          | 2.159(3)□   | Mn(3)-O(18)#2       | 2.190(3)□   |
| Mn(3)-O(17)         | 2.203(2)□   | Mn(3)-O(26)         | 2.216(3)□   |
| Mn(4)-O(12)         | 2.097(3)□   | Mn(4)-O(12)#4       | 2.097(3)□   |
| Mn(4)-O(19)#5       | 2.177(3)□   | Mn(4)-O(19)#2       | 2.177(3)□   |
| Mn(4)-O(17)         | 2.220(3)□   | Mn(4)-O(17)#4       | 2.221(3)    |
| O(6)-Mn(1)-O(6)#1   | 179.998(2)□ | O(6)-Mn(1)-O(4)#2   | 89.22(10)□  |
| O(6)#1-Mn(1)-O(4)#2 | 90.78(10)□  | O(6)-Mn(1)-O(4)#3   | 90.78(10)□  |
| O(6)#1-Mn(1)-O(4)#3 | 89.22(10)□  | O(4)#2-Mn(1)-O(4)#3 | 179.998(2)□ |
| O(6)-Mn(1)-O(1)#1   | 88.52(11)□  | O(6)#1-Mn(1)-O(1)#1 | 91.48(11)□  |
| O(4)#2-Mn(1)-O(1)#1 | 103.41(10)□ | O(4)#3-Mn(1)-O(1)#1 | 76.59(10)□  |

|                       |             |                       |             |
|-----------------------|-------------|-----------------------|-------------|
| O(6)-Mn(1)-O(1)       | 91.48(11)°  | O(6)#1-Mn(1)-O(1)     | 88.52(11)°  |
| O(4)#2-Mn(1)-O(1)     | 76.59(10)°  | O(4)#3-Mn(1)-O(1)     | 103.41(10)° |
| O(1)#1-Mn(1)-O(1)     | 180.0°      | O(13)-Mn(2)-O(7)      | 88.94(10)°  |
| O(13)-Mn(2)-O(25)     | 87.87(10)°  | O(7)-Mn(2)-O(25)      | 174.82(10)° |
| O(13)-Mn(2)-O(4)#2    | 141.84(10)° | O(7)-Mn(2)-O(4)#2     | 87.29(10)°  |
| O(25)-Mn(2)-O(4)#2    | 92.70(10)°  | O(13)-Mn(2)-O(2)      | 92.56(10)°  |
| O(7)-Mn(2)-O(2)       | 93.33(10)°  | O(25)-Mn(2)-O(2)      | 90.89(10)°  |
| O(4)#2-Mn(2)-O(2)     | 125.57(9)°  | O(13)-Mn(2)-O(1)      | 147.22(10)° |
| O(7)-Mn(2)-O(1)       | 95.62(10)°  | O(25)-Mn(2)-O(1)      | 89.28(10)°  |
| O(4)#2-Mn(2)-O(1)     | 70.91(10)°  | O(2)-Mn(2)-O(1)       | 54.84(9)°   |
| O(13)-Mn(2)-O(3)#2    | 86.92(9)°   | O(7)-Mn(2)-O(3)#2     | 89.99(10)°  |
| O(25)-Mn(2)-O(3)#2    | 85.76(9)°   | O(4)#2-Mn(2)-O(3)#2   | 55.14(9)°   |
| O(2)-Mn(2)-O(3)#2     | 176.62(9)°  | O(1)-Mn(2)-O(3)#2     | 125.41(9)°  |
| O(11)-Mn(3)-O(8)      | 84.72(10)°  | O(11)-Mn(3)-O(18)#2   | 98.36(11)°  |
| O(8)-Mn(3)-O(18)#2    | 91.01(10)°  | O(11)-Mn(3)-O(17)     | 91.71(10)°  |
| O(8)-Mn(3)-O(17)      | 148.90(9)°  | O(18)#2-Mn(3)-O(17)   | 120.04(11)° |
| O(11)-Mn(3)-O(26)     | 169.94(10)° | O(8)-Mn(3)-O(26)      | 91.48(10)°  |
| O(18)#2-Mn(3)-O(26)   | 91.00(11)°  | O(17)-Mn(3)-O(26)     | 86.74(10)°  |
| O(12)-Mn(4)-O(12)#4   | 179.998(1)° | O(12)-Mn(4)-O(19)#5   | 85.82(11)°  |
| O(12)#4-Mn(4)-O(19)#5 | 94.18(11)°  | O(12)-Mn(4)-O(19)#2   | 94.18(11)°  |
| O(12)#4-Mn(4)-O(19)#2 | 85.82(11)°  | O(19)#5-Mn(4)-O(19)#2 | 180.0°      |
| O(12)-Mn(4)-O(17)     | 88.87(10)°  | O(12)#4-Mn(4)-O(17)   | 91.13(10)°  |
| O(19)#5-Mn(4)-O(17)   | 97.15(10)°  | O(19)#2-Mn(4)-O(17)   | 82.85(10)°  |
| O(12)-Mn(4)-O(17)#4   | 91.13(10)°  | O(12)#4-Mn(4)-O(17)#4 | 88.87(10)°  |
| O(19)#5-Mn(4)-O(17)#4 | 82.85(10)°  | O(19)#2-Mn(4)-O(17)#4 | 97.15(10)°  |
| O(17)-Mn(4)-O(17)#4   | 179.999(1)° |                       |             |

Symmetry transformations used to generate equivalent atoms: #1  $-x + 2, -y + 1, -z + 1$ ; #2  $x + 1, y, z$ ; #3  $-x + 1, -y + 1, -z + 1$ ; #4  $-x + 2, -y + 2, -z$ ; #5  $-x + 1, -y + 2, -z$ .

**Table S5 Selected bond lengths (Å) and angles (°) for 5**

|                     |              |                     |              |
|---------------------|--------------|---------------------|--------------|
| Mn(1)-O(3)#1        | 2.1408(16) Å | Mn(1)-O(4)#2        | 2.1433(16) Å |
| Mn(1)-N(1)          | 2.223(2) Å   | Mn(1)-N(4)#3        | 2.228(2) Å   |
| Mn(1)-O(1)          | 2.2610(16) Å | Mn(1)-O(2)          | 2.3510(17) Å |
| O(3)#1-Mn(1)-O(4)#2 | 112.87(6)°   | O(3)#1-Mn(1)-N(1)   | 90.63(7)°    |
| O(4)#2-Mn(1)-N(1)   | 95.64(7)°    | O(3)#1-Mn(1)-N(4)#3 | 86.61(7)°    |
| O(4)#2-Mn(1)-N(4)#3 | 85.13(7)°    | N(1)-Mn(1)-N(4)#3   | 177.22(7)°   |
| O(3)#1-Mn(1)-O(1)   | 97.64(6)°    | O(4)#2-Mn(1)-O(1)   | 149.03(6)°   |
| N(1)-Mn(1)-O(1)     | 88.97(7)°    | N(4)#3-Mn(1)-O(1)   | 91.73(7)°    |
| O(3)#1-Mn(1)-O(2)   | 154.44(6)°   | O(4)#2-Mn(1)-O(2)   | 92.26(6)°    |
| N(1)-Mn(1)-O(2)     | 91.44(7)°    | N(4)#3-Mn(1)-O(2)   | 91.20(7)°    |
| O(1)-Mn(1)-O(2)     | 56.94(6)°    |                     |              |

Symmetry transformations used to generate equivalent atoms: #1  $-x, -y + 1, -z + 2$ ; #2  $x + 1, y - 1, z$ ; #3  $x, y - 1, z + 1$ .

**Table S6 Selected bond lengths (Å) and angles (°) for 6**

|                     |             |                     |             |
|---------------------|-------------|---------------------|-------------|
| Mn(1)-O(1)#1        | 2.132(3) Å  | Mn(1)-O(2)          | 2.145(3) Å  |
| Mn(1)-O(4)#2        | 2.214(3) Å  | Mn(1)-N(1)#3        | 2.235(4) Å  |
| Mn(1)-N(3)          | 2.259(4) Å  | Mn(1)-O(3)#2        | 2.347(3) Å  |
| O(1)#1-Mn(1)-O(2)   | 118.49(11)° | O(1)#1-Mn(1)-O(4)#2 | 150.93(11)° |
| O(2)-Mn(1)-O(4)#2   | 90.58(11)°  | O(1)#1-Mn(1)-N(1)#3 | 86.46(13)°  |
| O(2)-Mn(1)-N(1)#3   | 92.32(12)°  | O(4)#2-Mn(1)-N(1)#3 | 92.68(12)°  |
| O(1)#1-Mn(1)-N(3)   | 85.06(13)°  | O(2)-Mn(1)-N(3)     | 90.80(12)°  |
| O(4)#2-Mn(1)-N(3)   | 95.24(13)°  | N(1)#3-Mn(1)-N(3)   | 171.45(14)° |
| O(1)#1-Mn(1)-O(3)#2 | 93.50(10)°  | O(2)-Mn(1)-O(3)#2   | 147.93(11)° |

O(4)#2-Mn(1)-O(3)#2 57.45(10)°  
N(3)-Mn(1)-O(3)#2 94.35(12)

N(1)#3-Mn(1)-O(3)#2 87.22(12)°

Symmetry transformations used to generate equivalent atoms: #1  $-x + 2, y, -z + 1/2$ ; #2  $x + 1/2, -y + 1/2, -z + 1$ ;  
#3  $x + 1/2, y + 1/2, -z + 1/2$ .

**Table S7 Hydrogen bonds for 4**

| D-H...A                  | d(D-H) | d(H...A) | d(D...A) | <(DHA) |
|--------------------------|--------|----------|----------|--------|
| O(21)-H(1W)...O(9)#7     | 0.85   | 1.95     | 2.767(4) | 159.9  |
| O(21)-H(2W)...O(24)#1    | 0.85   | 1.97     | 2.795(4) | 163.7  |
| O(22)-H(3W)...O(3)       | 0.85   | 2.10     | 2.846(4) | 146.2  |
| O(22)-H(4W)...O(26)W#8   | 0.85   | 2.19     | 2.820(4) | 131.0  |
| O(23)-H(6W)...O(26)W#8   | 0.85   | 2.00     | 2.846(4) | 171.6  |
| O(24)-H(7W)...O(25)W     | 0.85   | 2.10     | 2.914(4) | 160.0  |
| O(24)-H(8W)...O(16)#9    | 0.85   | 2.18     | 3.025(5) | 179.7  |
| O(25)-H(9W)...O(14)      | 0.85   | 1.89     | 2.670(4) | 151.1  |
| O(25)-H(10W)...O(23)W    | 0.85   | 1.87     | 2.708(4) | 166.8  |
| O(26)-H(11W)...O(9)      | 0.85   | 1.95     | 2.706(4) | 147.5  |
| O(26)-H(12W)...O(22)W#10 | 0.85   | 1.98     | 2.820(4) | 168.0  |

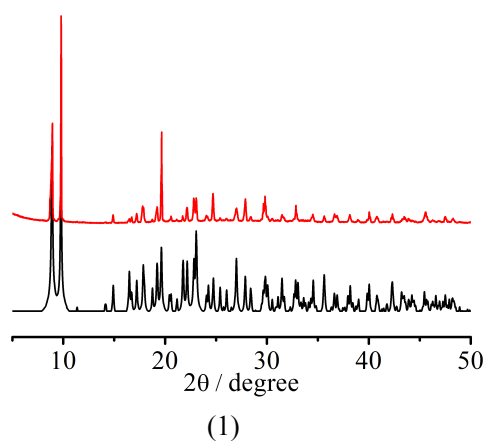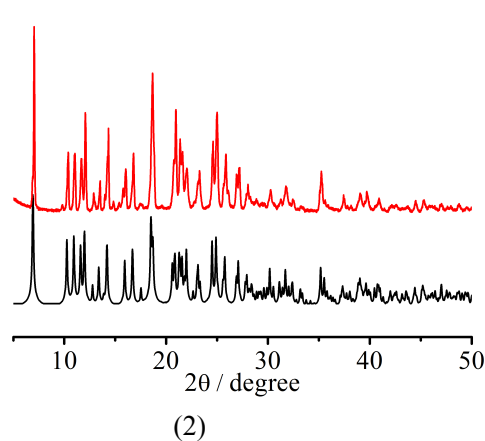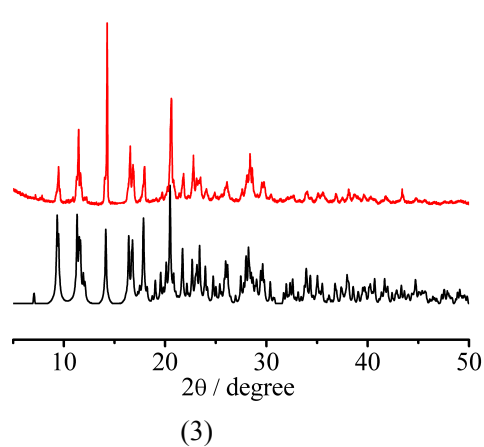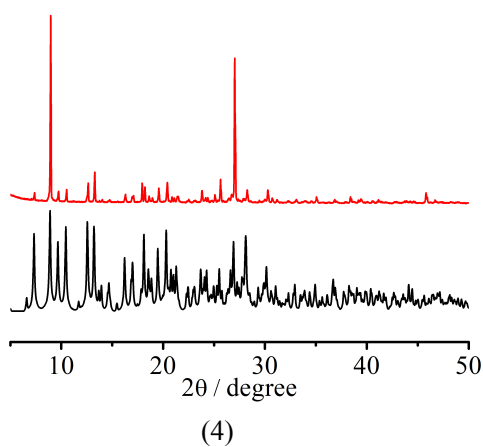

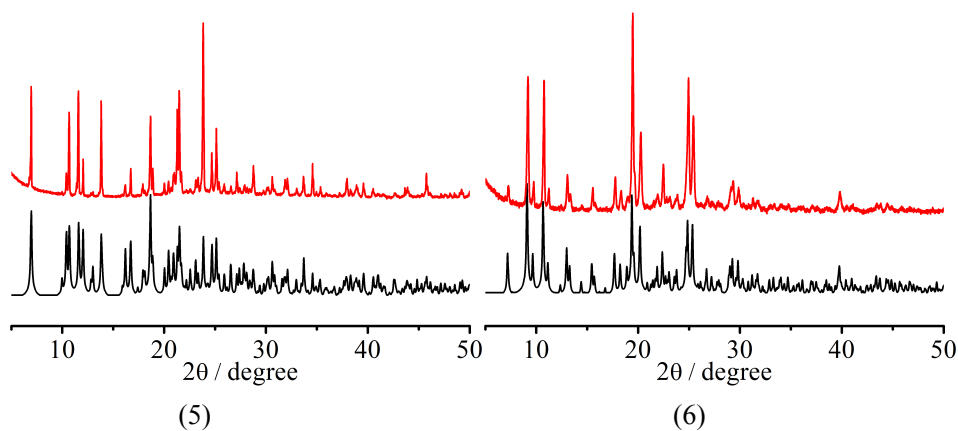

Figure S1 The XRPD patterns for complexes 1–6: the as-synthesized patterns (red) and the simulated based on X-ray single-crystal data (black).

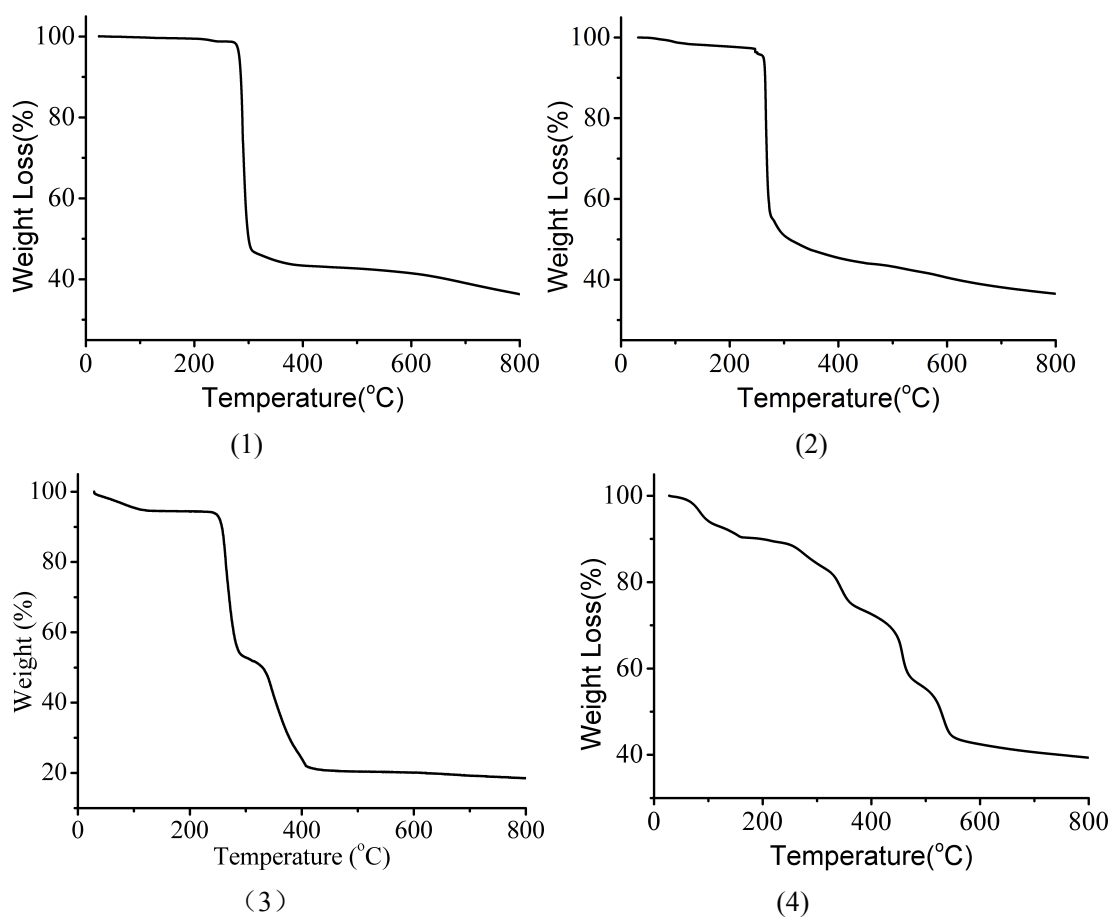

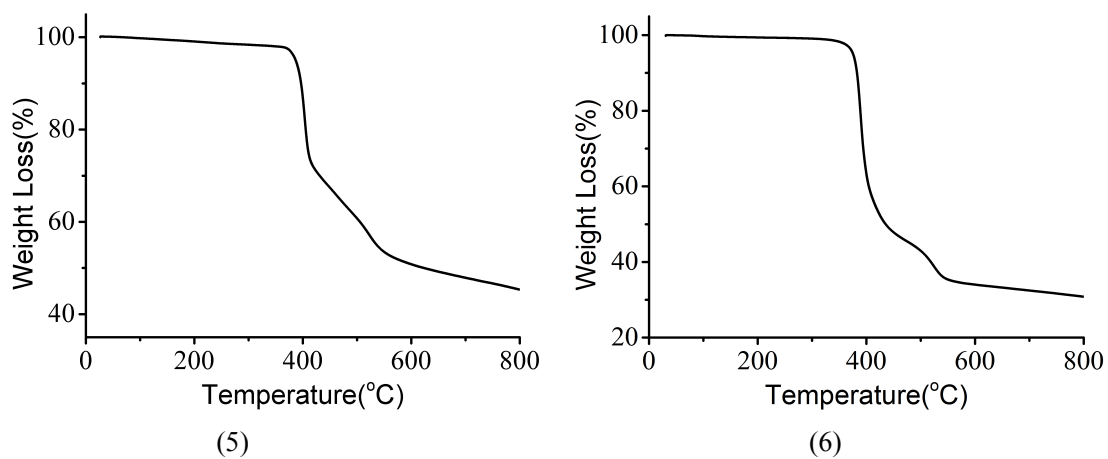

Figure S2. Thermogravimetric curves of complexes 1–6.
